# Supplementary material for: PPT1 inhibition enhances the antitumor activity of anti–PD-1 antibody in melanoma
Source: PubMed Central journal article supplement (PMC7526447; doi:10.1172/jci.insight.133225), 2020-09-03
Supplement: jciinsight-5-133225-s091.pdf [file jciinsight-5-133225-s091.pdf]

Supplementary Figures

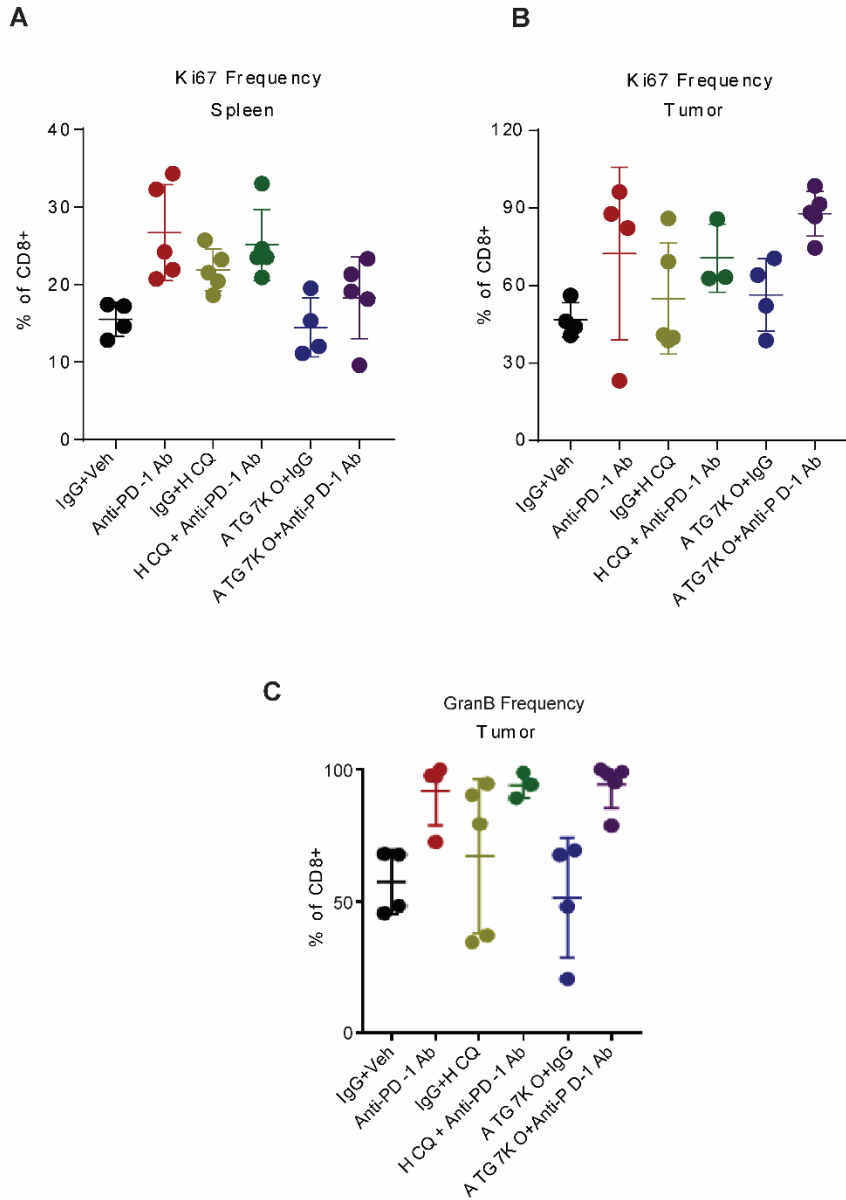

**Supplementary Fig. S2. Immunophenotyping of CD8+ T cells in the spleen and tumor of B16 *Atg7* WT and *Atg7* KO mice and LDH release in inhibitor treated or untreated primed splenocytes. (A) Frequency of CD8+Ki67+ T cells in the spleen of tumor bearing mice of the indicated treatment groups. (B) Representation of the frequency of CD8+Ki67+ T cells in the spleen of tumor bearing mice of the indicated treatment groups. (C) Frequency of CD8+GranzymeB+ T cells in tumor. \*, p< 0.05, testing the hypothesis that the addition of HCQ to anti-PD-1 Ab is significantly different compared to anti-PD-1 Ab+Veh.**

4  
5  
6  
7  
8

## Supplementary Figures

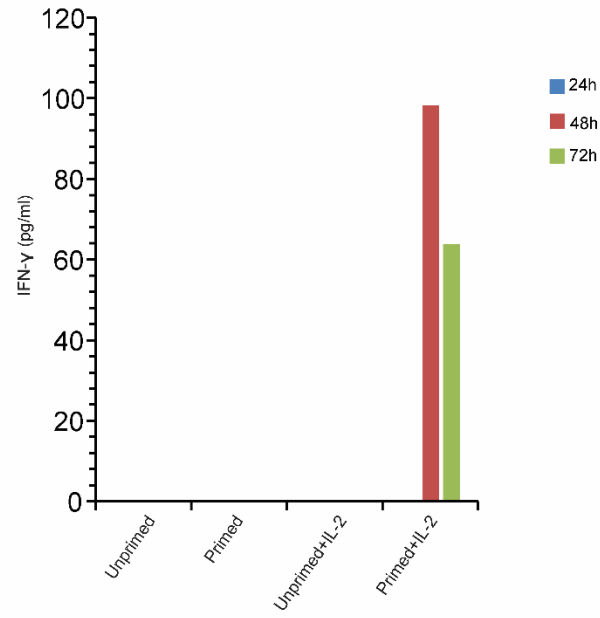

**Supplementary Fig. S3. Splenocyte priming.** IFN-γ ELISA to confirm irradiated B16 mediated splenocytes priming in the presence or absence of interleukin-2 for 24, 48 and 72h

9  
10  
11  
12  
13  
14  
15  
16  
17  
18  
19  
20  
21  
22  
23  
24

Supplementary Figures

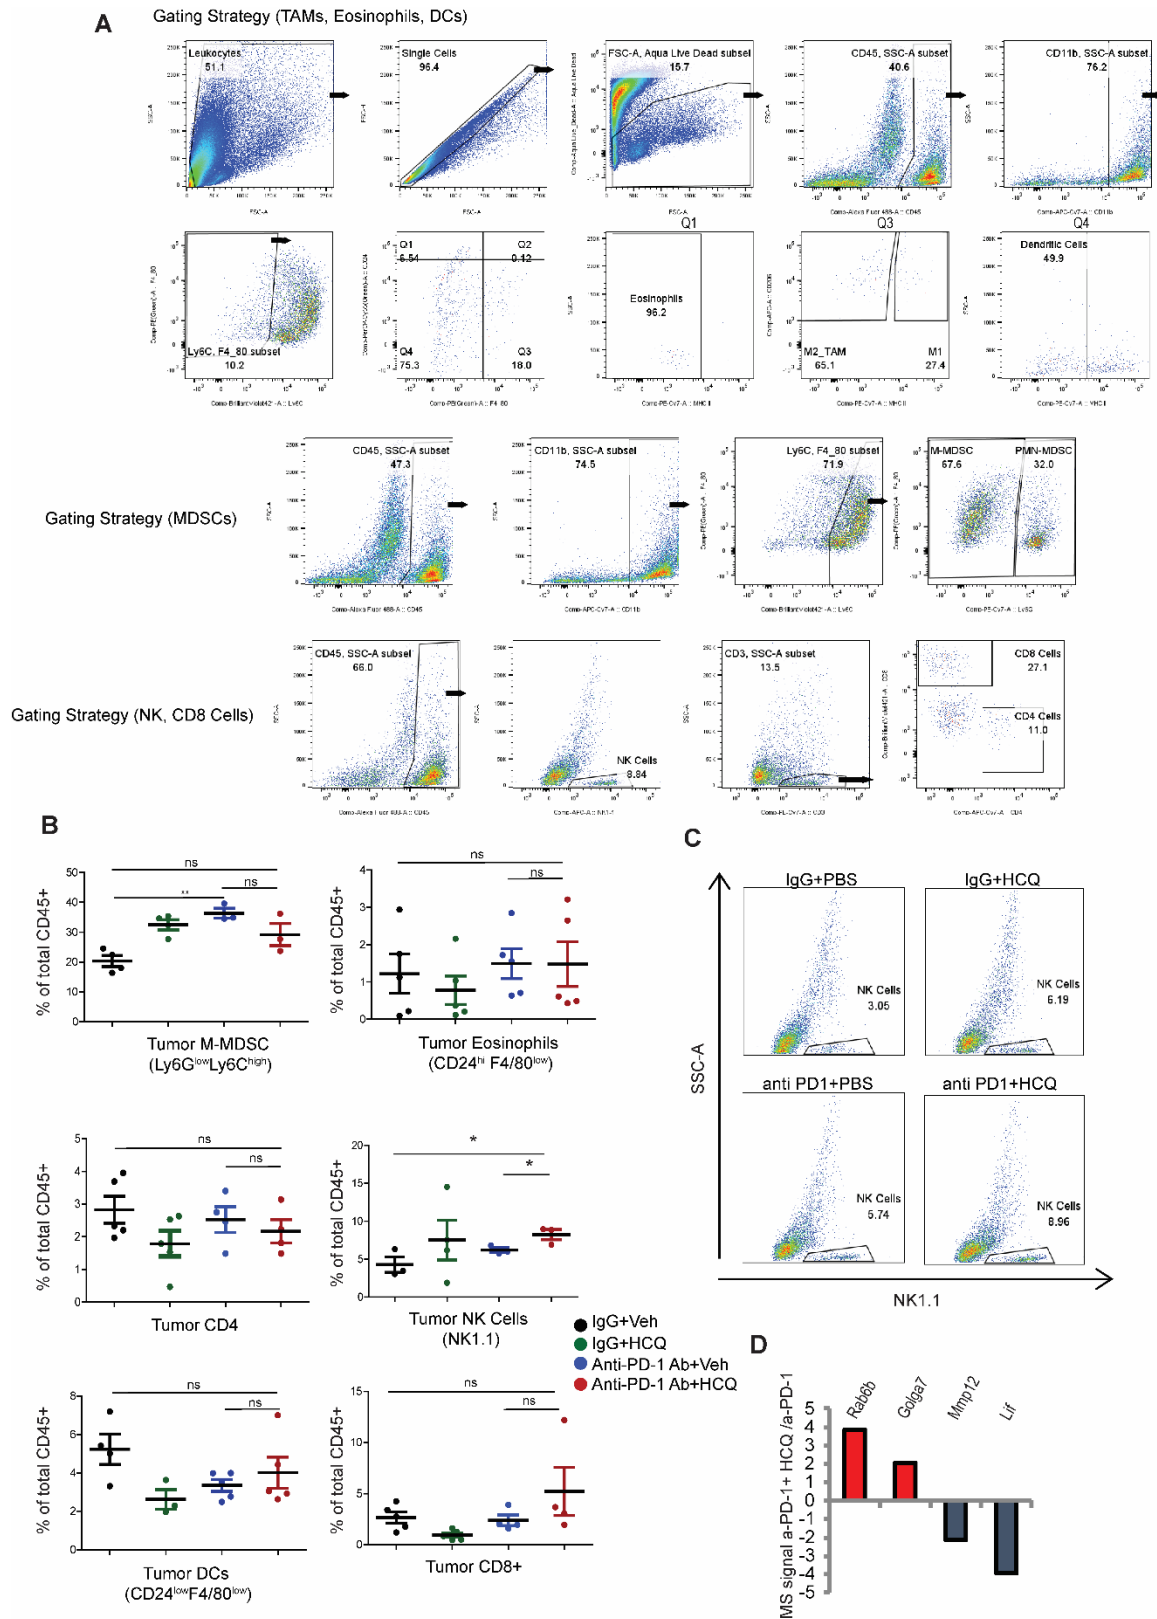

**Supplementary Fig. S4. Gating Strategy for Flowcytometry and immunophenotyping of B16 tumors and proteomics of whole B16 tumor. (A)** flowcytometry analysis and gating strategy for TAMs, Eosinophils, DCs, MDSCs, CD8, NK cells in B16 tumor. **(B)** Representation immunophenotyping plot for Tumor M-MDSCs, eosinophils, DCs, CD8, CD4 and NK cells. **(C)** Representation of Immunophenotyping of TILs in B16 Tumors. **(D)** Identification of macrophages proteins that are significantly increased or decreased in HCQ+anti-PD-1 Ab vs only anti-PD-1 Ab+Veh. \*,  $p < 0.05$ , testing the hypothesis that the addition of HCQ to anti-PD-1 Ab is significantly different compared to anti-PD-1 Ab+Veh.

Supplementary Figures

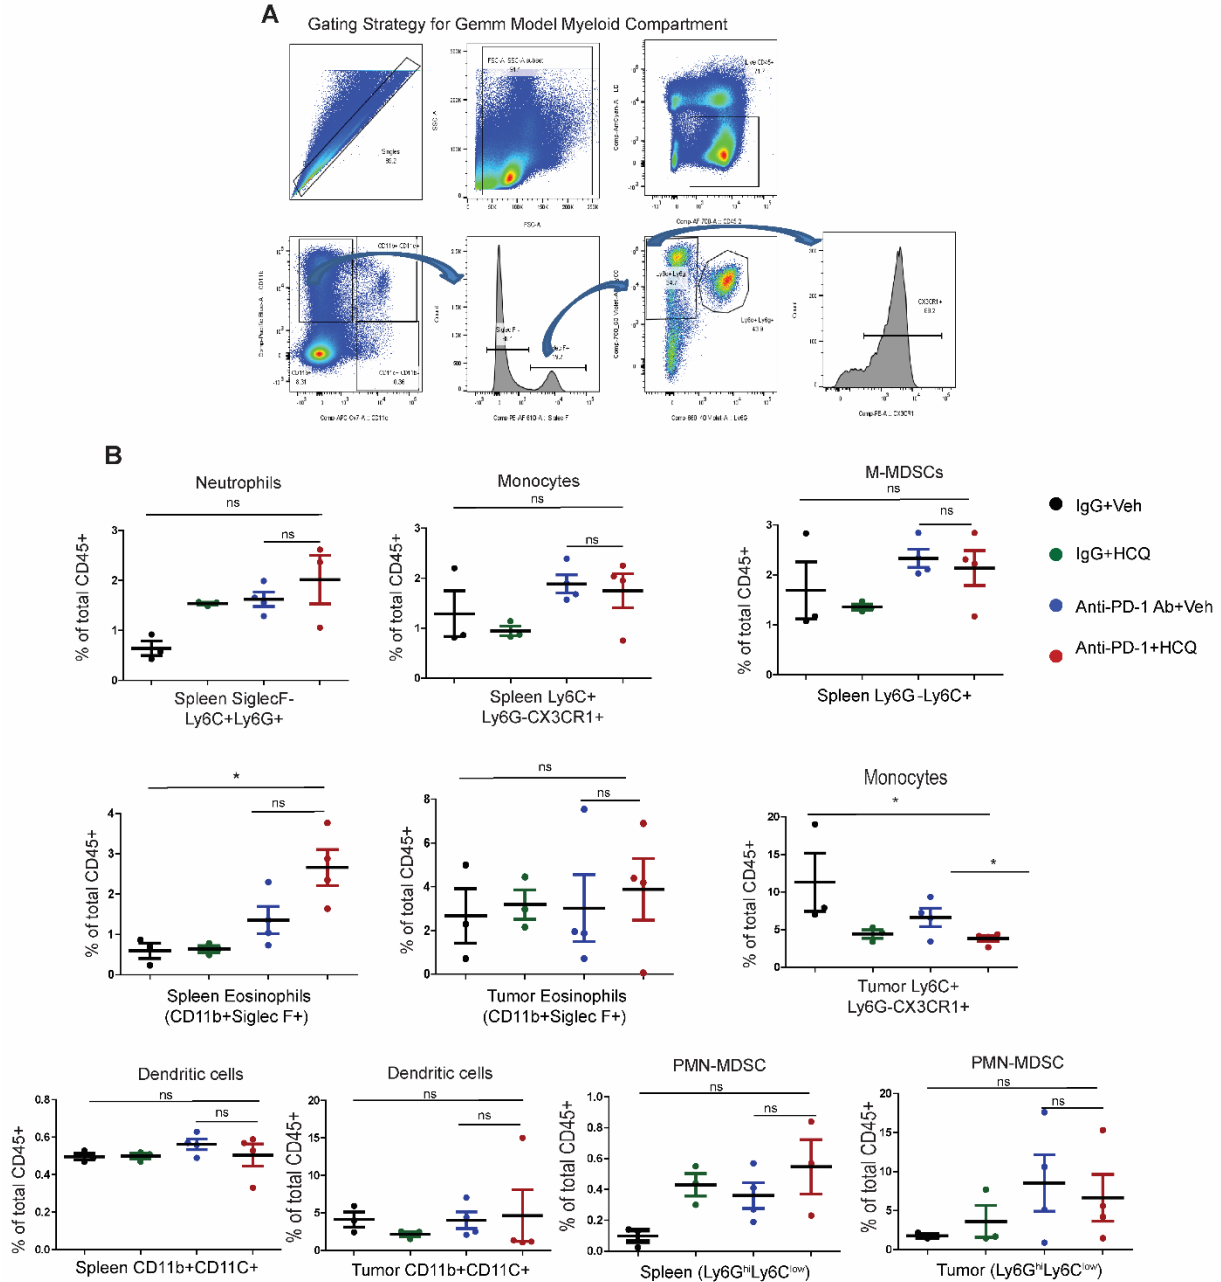

Supplementary Fig. S5. Gating strategy for Flowcytometry and Immunophenotyping in *Braf<sup>CA</sup>, Pten<sup>fl/fl</sup>, Tyr::CreER<sup>2</sup>* mice melanoma tumor.

(A) Gating strategy for immunophenotyping in *Braf<sup>CA</sup>, Pten<sup>fl/fl</sup>, Tyr::CreER<sup>2</sup>* mice melanoma. (B) Representation of Immunophenotyping of tumor infiltrating myeloid cells in the excised tumor as indicated. \*,  $p < 0.05$ , testing the hypothesis that the addition of HCQ to anti-PD-1 Ab is significantly different compared to anti-PD-1 Ab+Veh.

26

27

28

29

30

Supplementary Figures

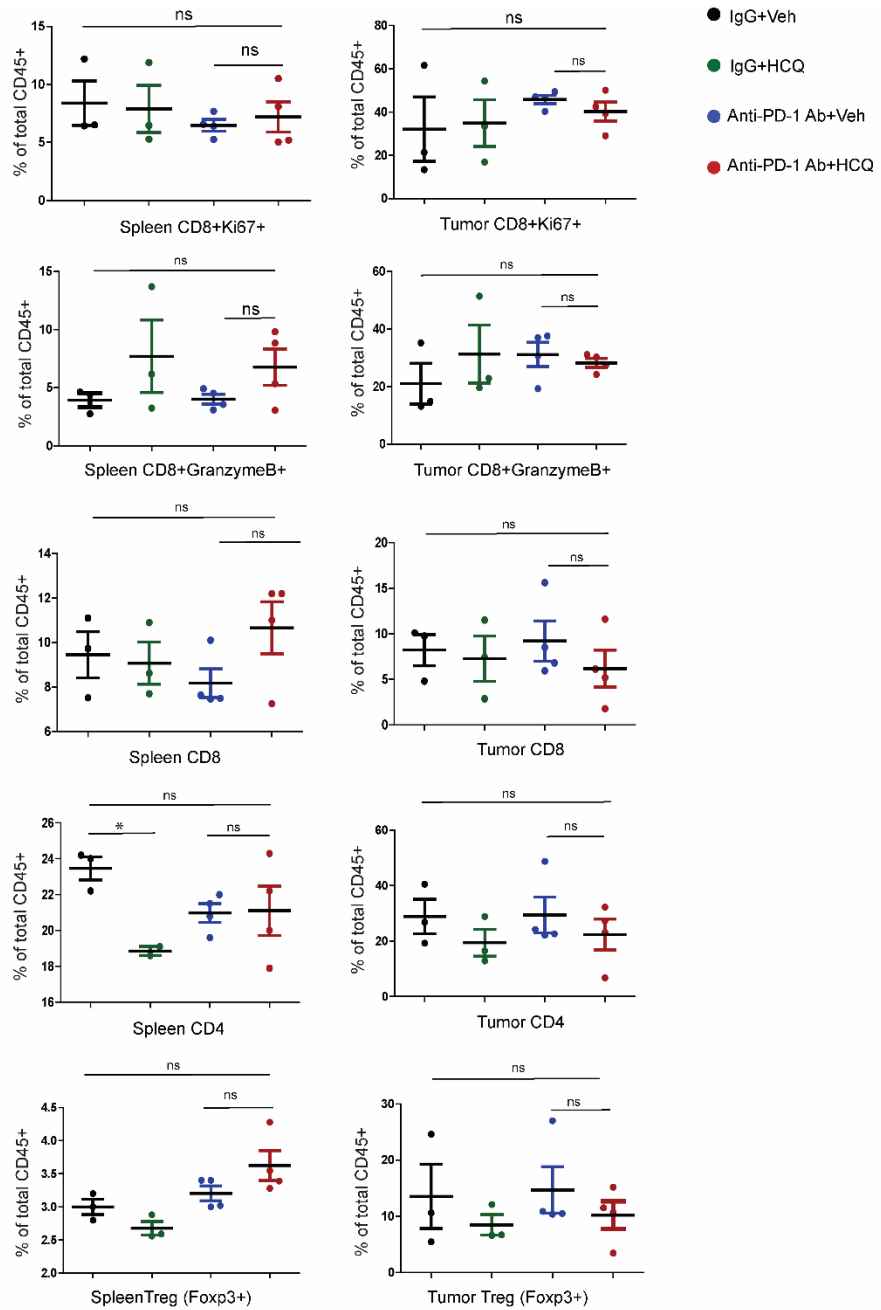

Supplementary Fig. S6. Immunophenotyping in *Braf<sup>G4</sup>, Pten<sup>fl/fl</sup>, Tyr::CreER<sup>T2</sup>* mice melanoma. Immunophenotyping of tumor infiltrating leukocytes in excised tumor of *Braf<sup>G4</sup>, Pten<sup>fl/fl</sup>, Tyr::CreER<sup>T2</sup>* mice. \*,  $p < 0.05$ , testing the hypothesis that the addition of HCQ to anti-PD-1 Ab is significantly different compared to anti-PD-1 Ab+Veh.

31

32

33

34

35

36

**Table 1**

| <b>S. No.</b> | <b>Source</b>  | <b>Reagent or Resource</b> | <b>Identifier</b> |
|---------------|----------------|----------------------------|-------------------|
| 1             | BD Biosciences | CD11b-APC-Cy7              | 557657            |
| 2             | BD Biosciences | Ly-6C-BV421                | 562727            |
| 3             | BD Biosciences | Ly-6G-PE-Cy7               | 560601            |
| 4             | BD Biosciences | CD45-FITC                  | 553080            |
| 5             | BD Biosciences | CD11c-APC                  | 550261            |
| 6             | BD Biosciences | NK1.1-APC                  | 550627            |
| 7             | BD Biosciences | Foxp3-PE                   | 560408            |
| 8             | BD Biosciences | CD3-PE-Cy7                 | 552774            |
| 9             | BD Biosciences | CD24-PerCP-Cy5.5           | 562360            |
| 10            | BD Biosciences | CD16/CD32 purified         | 553142            |
| 11            | BD Biosciences | Mouse Foxp3 Buffer Set     | 560409            |
| 12            | BD Biosciences | CD3e-BV605                 | 563004            |
| 13            | BD Biosciences | Ly6G-BV650                 | 740554            |
| 14            | BD Biosciences | CTLA-4-PE-CF594            | 564332            |
| 15            | BioLegend      | Anti-PD-1 Ab               | 92130             |
| 16            | BioLegend      | CD8-BV421                  | 100753            |
| 17            | BioLegend      | CD11b- BV421               | 101251            |
| 18            | BioLegend      | MHC II-PE-Cy7              | 116419            |
| 19            | BioLegend      | Ly6C-BV785                 | 128041            |
| 20            | BioLegend      | PDL1-APC                   | 124311            |

|    |                              |                              |            |
|----|------------------------------|------------------------------|------------|
| 21 | BioLegend                    | CD45.2-AlexaFlour700         | 109821     |
| 22 | BioLegend                    | MHC II-FITC                  | 107605     |
| 23 | BioLegend                    | F4/80-PerCP/Cy5.5            | 123127     |
| 24 | BioLegend                    | CX3CR1-PE                    | 149005     |
| 25 | BioLegend                    | CD80-PE/Cy5                  | 104711     |
| 26 | BioLegend                    | PD1-PE/Cy7                   | 109109     |
| 27 | BioLegend                    | CD4-BV605                    | 100451     |
| 28 | BioLegend                    | CD8-BV650                    | 100741     |
| 29 | BioLegend                    | CD25- PE/Cy5                 | 102010     |
| 30 | Ebioscience                  | CD4-APC-eFluor 780           | 47-0041-82 |
| 31 | Ebioscience                  | CD206-APC                    | 17-2061-80 |
| 32 | Ebioscience                  | F4/80-PE                     | 12-4801-82 |
| 33 | ThermoFisher Scientific      | Aqua Live / Dead Fixable 405 | L34966     |
| 34 | ThermoFisher Scientific      | CD11c-APCeFluor780           | 47-0032-82 |
| 35 | ThermoFisher Scientific      | CD19                         | 47-0193-82 |
| 36 | ThermoFisher Scientific      | NK1.1-APCeFluor780           | 47-5941-82 |
| 37 | ThermoFisher Scientific      | Ki67-FITC                    | 11-5698-82 |
| 38 | ThermoFisher Scientific      | CD39-PerCP-eFluor710         | 46-0391-82 |
| 39 | ThermoFisher Scientific      | GranzymeB-PE                 | 12-8898-82 |
| 40 | Cell Signaling<br>Technology | b-Actin                      | 4970       |
| 41 | Cell Signaling<br>Technology | ATG7                         | 8558       |



|    |                              |            |           |
|----|------------------------------|------------|-----------|
| 42 | Cell Signaling<br>Technology | Caspase 7  | 8438      |
| 43 | Cell Signaling<br>Technology | Caspase 9  | 20750     |
| 44 | Cell Signaling<br>Technology | cGAS       | 31659     |
| 45 | Cell Signaling<br>Technology | STING      | 50494     |
| 46 | Cell Signaling<br>Technology | p-TBK1     | 5483      |
| 47 | Cell Signaling<br>Technology | Total TBK1 | 3504      |
| 48 | Cell Signaling<br>Technology | ULK1       | 8054      |
| 49 | Cell Signaling<br>Technology | PIK3C3     | 4263      |
| 50 | Cell Signaling<br>Technology | ATG7       | 8558      |
| 51 | Thermofisher<br>Scientific   | PPT1       | PA5-86510 |
| 52 | Spectrum chemicals           | HCQ        | H1126     |
| 53 | Peprtech                     | IL-4       | 214-14    |
| 54 | Peprtech                     | IL-10      | 210-13    |

|    |                     |                                                                                                       |               |
|----|---------------------|-------------------------------------------------------------------------------------------------------|---------------|
| 55 | Peprotech           | IFN- $\gamma$                                                                                         | 315-05        |
| 56 | Peprotech           | M-CSF                                                                                                 | 14-8983-80    |
| 57 | Sigma aldrich       | LPS                                                                                                   | L-5668        |
| 58 | Sigma aldrich       | PPT1 siRNA pool                                                                                       | EMU085041     |
| 59 | Origene             | PPT1 siRNA single duplex                                                                              | SR409088      |
| 60 | Miltenyi Biotech    | Tumor Digestion kit                                                                                   | 130-096-730   |
| 61 | Miltenyi Biotech    | CD11b                                                                                                 | 101251        |
| 62 | Santa Cruz Biotech. | ULK1 siRNA                                                                                            | sc-44849      |
| 63 | Santa Cruz Biotech. | PIK3C3 siRNA                                                                                          | sc-62803      |
| 64 | Santa Cruz Biotech. | ATG7 siRNA                                                                                            | sc-41448      |
| 65 | Santa Cruz Biotech. | PPT1 siRNA                                                                                            | sc-142398     |
| 66 | Jackson laboratory  | C57BL6                                                                                                | Stock# 000664 |
| 67 | Jackson laboratory  | B6.Cg- <i>Braf</i> <sup>tm1Mmcm</sup> <i>Pten</i> <sup>tm1Hwu</sup><br>Tg(Tyr-<br>cre/ERT2)13Bos/BosJ | Stock#013590  |
